# Supplementary material for: A Cu-based metal–organic framework synthesized via a green method exhibits unique catecholase-like activity for epigallocatechin gallate detection in teas
Source: Royal Society of Chemistry journal article supplement (doi:10.1039/d4ay01733a), 2024-01-01
Supplement: d4ay01733a1.pdf [file d4ay01733a1.pdf]

1 **Cu-Based Metal-Organic Framework Synthesized via Green Method Exhibits Unique**  
2 **Catecholase-Like Activity for Epigallocatechin Gallate Detection in Teas**

3

4 Sivasankar Kulandaivel, Yu-Meng Wang, Sung-Fang Chen\*, Chia-Her Lin\*, and Yi-Chun Yeh\*

5

6 Department of Chemistry, National Taiwan Normal University, Taipei 116, Taiwan.

7

8

9

10

11

12

13

14 \*Corresponding authors: Sung-Fang Chen, Chia-Her Lin and Yi-Chun Yeh

15 E-mail: [sfchen@ntnu.edu.tw](mailto:sfchen@ntnu.edu.tw); [chiaher@ntnu.edu.tw](mailto:chiaher@ntnu.edu.tw); [yichuny@ntnu.edu.tw](mailto:yichuny@ntnu.edu.tw).

16

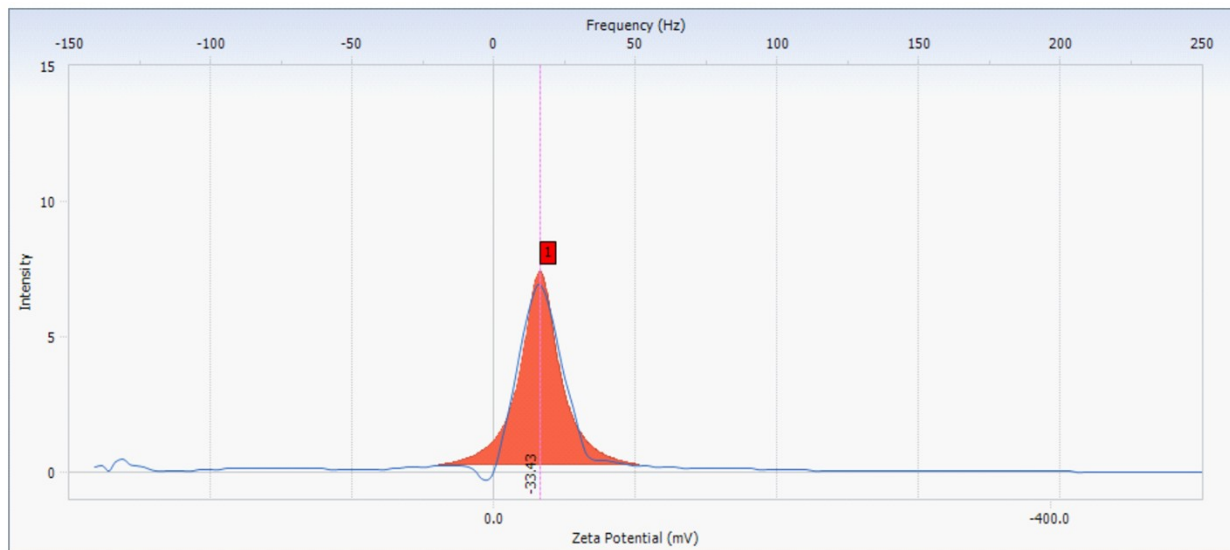

17

18 **Figure S1.** The zeta potential analysis of Cu-PyC NH<sub>4</sub><sup>+</sup> MOF.

19

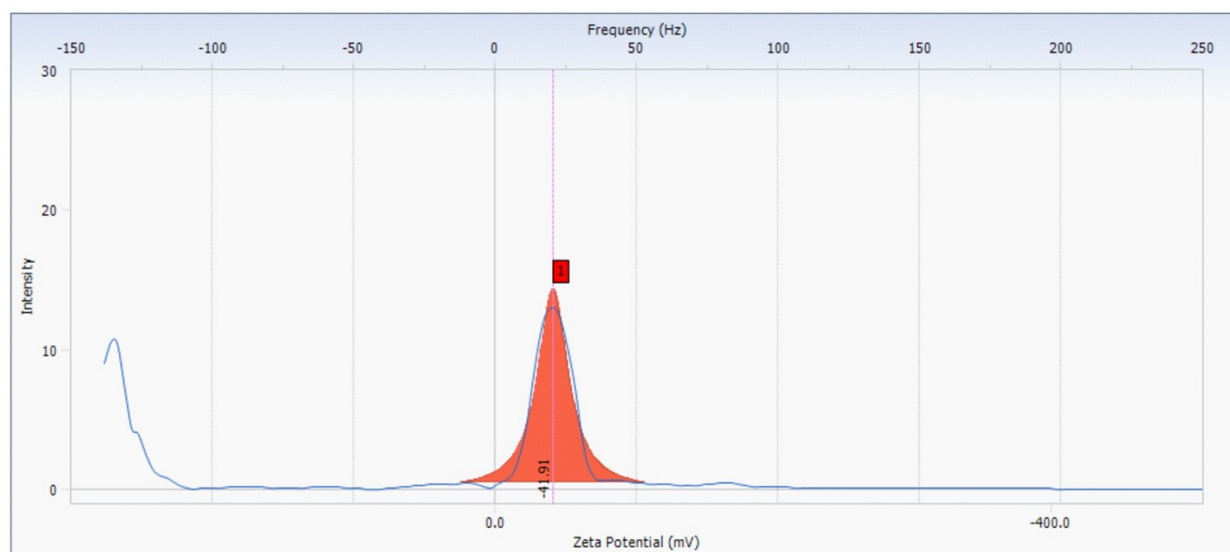

20

21 **Figure S2.** The zeta potential analysis of Cu-PyC NH<sub>4</sub><sup>+</sup> MOF after EGCG oxidation.

22

23

24

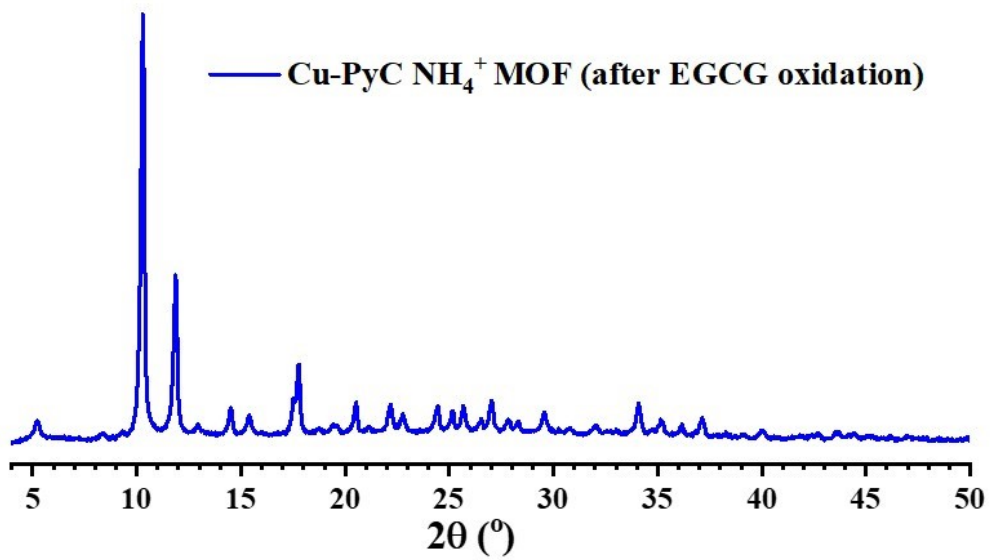

25

26 **Figure S3.** PXRD analysis of Cu-PyC NH<sub>4</sub><sup>+</sup> MOF after EGCG oxidation.

27

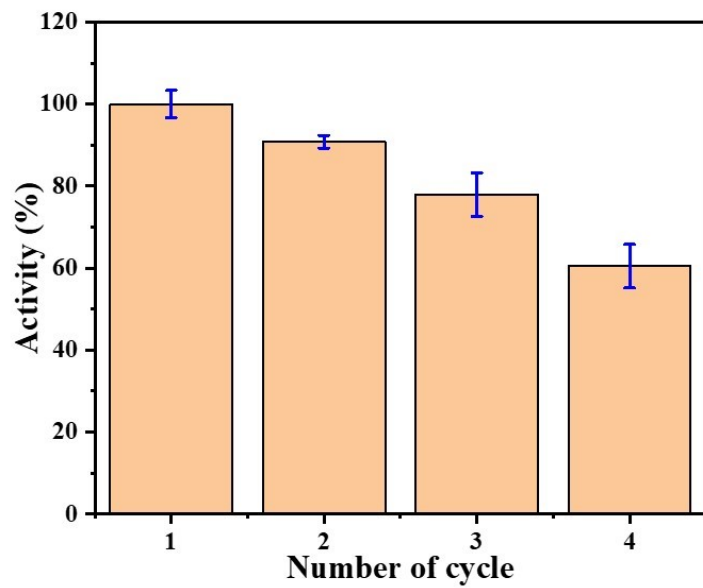

28

29 **Figure S4.** Cu-PyC NH<sub>4</sub><sup>+</sup> MOF recyclability test for EGCG oxidation.

30

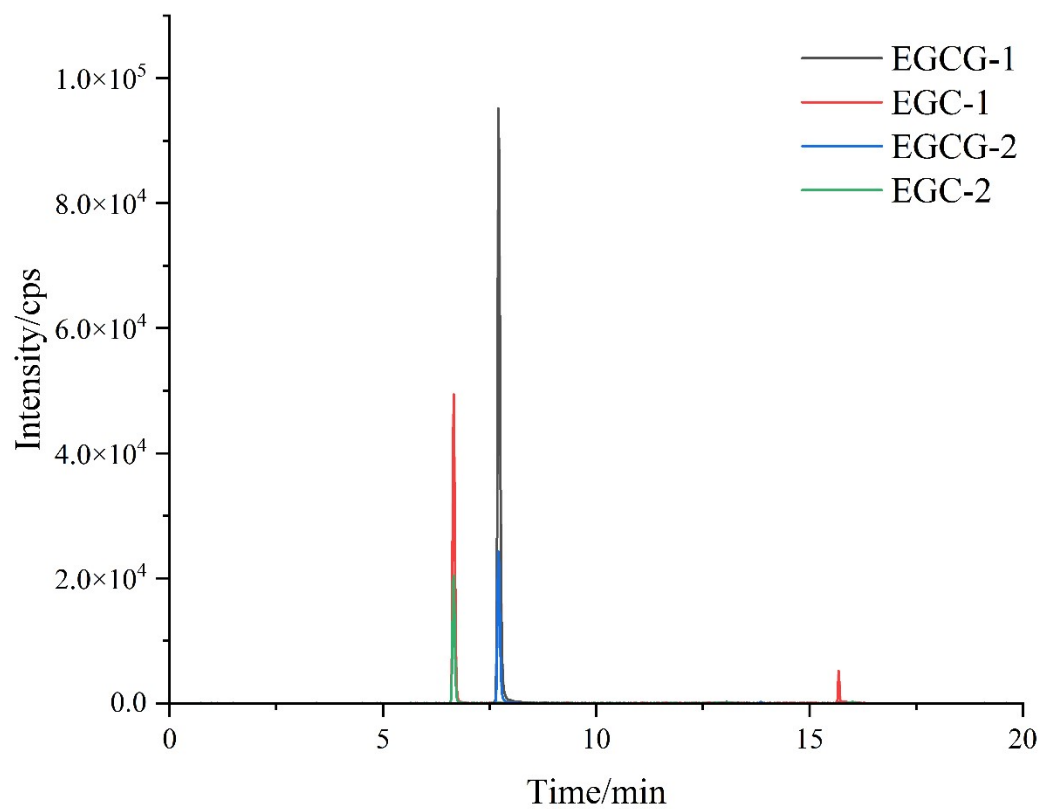

31

**Figure S5.** MRM chromatogram of EGCG and EGC.

33 **Table S1:** Comparison of Cu-PyC NH<sub>4</sub><sup>+</sup> MOF nanozyme performance with existing EGCG  
34 detection methods.

| Sample                                                | Detection method | Linear range             | LOD                 | References |
|-------------------------------------------------------|------------------|--------------------------|---------------------|------------|
| MIL-53(Fe,Al)                                         | Colorimetry      | 15-80 $\mu\text{M}$      | 0.719 $\mu\text{M}$ | (1)        |
| Fe <sub>3</sub> C/Fe-N-C                              | Colorimetry      | 0.2-1 $\mu\text{M}$      | 0.122 $\mu\text{M}$ | (2)        |
| AuNCs/Cu <sup>2+</sup> /H <sub>2</sub> O <sub>2</sub> | Fluorescence     | 10-140 $\mu\text{M}$     | 1.2 $\mu\text{M}$   | (3)        |
| STAT protein                                          | Electrochemistry | 10-100 $\mu\text{M}$     | 19 $\mu\text{M}$    | (4)        |
| Cu-PyC NH <sub>4</sub> <sup>+</sup> MOF               | Colorimetry      | 0.5 to 125 $\mu\text{M}$ | 0.79 $\mu\text{M}$  | This work  |

35

36

37 **Table S2.** MS parameter for analytes

| Compound | Q1  | Q3  | Dwell time<br>(msec) | DP  | EP  | CE  | CXP |
|----------|-----|-----|----------------------|-----|-----|-----|-----|
| EGCG_1   | 457 | 169 | 200                  | -56 | -4  | -24 | -9  |
| EGCG_2   | 457 | 125 | 200                  | -56 | -4  | -59 | -21 |
| EGC_1    | 305 | 125 | 200                  | -69 | -10 | -29 | -6  |
| EGC_2    | 305 | 179 | 200                  | -69 | -10 | -22 | -10 |

38

39 **Table S3.** Calibration curve and quantitative range

| Compound | Linear range<br>(ng/mL) | Linear equation | r     |
|----------|-------------------------|-----------------|-------|
| EGCG     | 1- 1000                 | $y= 579x + 565$ | 0.992 |

40

41

42

43

44

45

46

47

48

49

50

51

52

53

54

55

56

57

58

59

60

61

62

63

64

65 **References**

66

- 67 1. Tang J, Gao Z, Xu L, Zhao Q, Hu T, Luo Y, et al. Smartphone-assisted colorimetric biosensor for  
68 the rapid visual detection of natural antioxidants in food samples. *Food Chemistry*. 2025;462:141026.
- 69 2. Wu X-P, Wang Z-C, Li D-Y. Fabrication of Fe<sub>3</sub>C/Fe-N-C nanozymes-based cascade colorimetric  
70 sensor for detection and discrimination of tea polyphenols. *Chinese Journal of Analytical Chemistry*.  
71 2023;51(4):100243.
- 72 3. Kar P, Chang T-S, Chen C-Y, Chen J-S, Yi S, Sutradhar S, et al. Fluorescence Turn-On Antioxidant  
73 Recognition by Interface-Mediated Radical Termination of L-Cysteine-Capped Gold Nanoclusters. *ACS*  
74 *Applied Nano Materials*. 2021;4(4):3360-8.
- 75 4. Zeidan N, Su H, Aitken M, Gunning PT, Kerman K. Magnetic bead-based electrochemical  
76 detection of interaction between epigallocatechin-3-gallate and STAT proteins. *Analytical Methods*.  
77 2015;7(8):3566-9.

78
